# Supplementary material
Source: Springer Nature journal article supplement (https://www.springermedizin.de/resource/supplementary/12883_2011_564_MOESM1_ESM.pdf/9455404)

OSIT-J score

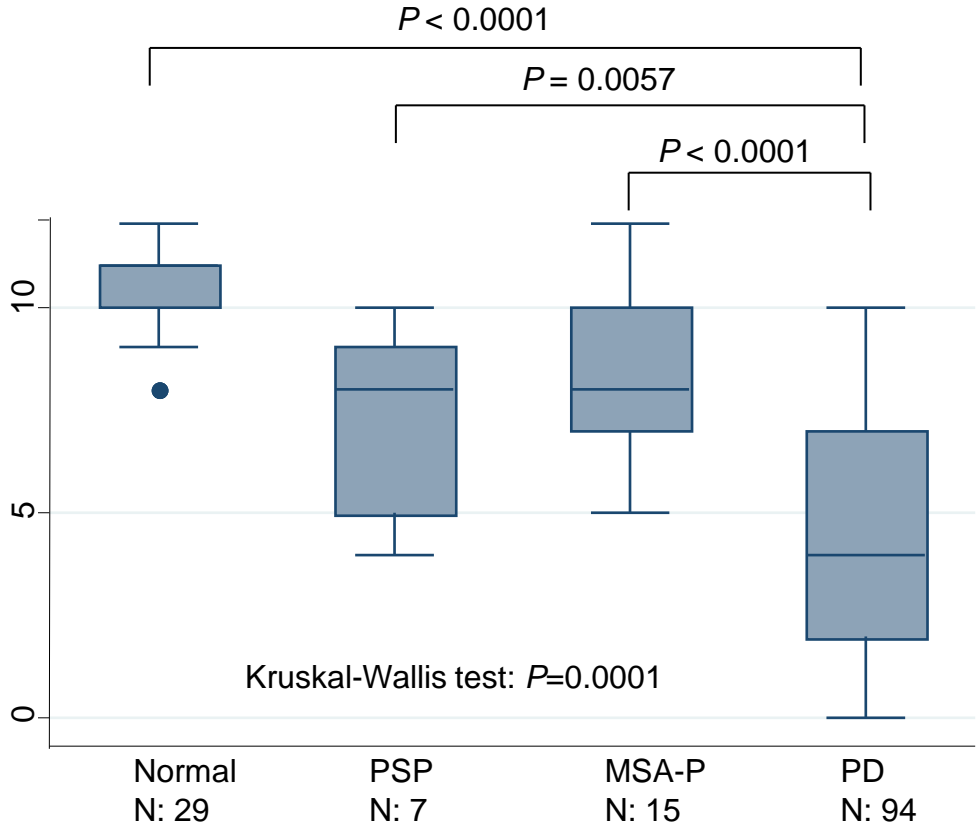

Supplement: MOESM1 [file 9455404]
